# Supplementary material
Source: PubMed Central journal article supplement (PMC4943391)
Supplement: supp_the2015-0509_Supplemental_Tables.pdf [file supp_the2015-0509_Supplemental_Tables.pdf]

Supplemental Tables for:  
 Endocrine Adverse Events of Immune Checkpoint Inhibitors: Review and Management  
 Delvys Rodriguez-Abreu et al.

**Table S1:** Endocrine Adverse Events in studies with anti-CTLA4 antibodies.

| Agent      | First Author<br>N                        | Phase | Tumor type (% of total if available)              | Pretreatment | Schedule                             | Endocrine AE, any grade (%) |      | Endocrine AE, grade 3-4 (%) |     |
|------------|------------------------------------------|-------|---------------------------------------------------|--------------|--------------------------------------|-----------------------------|------|-----------------------------|-----|
| Ipilimumab | Hodi et al. <sup>[1]</sup><br>N= 676     | III   | mMM                                               | Pretreated   | 3mg/kg Q3W alone or plus gp100       | Any endocrine AE            | 4.9  | Any endocrine AE            | 1.8 |
|            |                                          |       |                                                   |              |                                      | Ipilimumab only             | 3.9  | Ipilimumab only             | 1.1 |
|            |                                          |       |                                                   |              |                                      | + gp100                     | 7.6  | + gp100                     | 3.8 |
|            |                                          |       |                                                   |              |                                      | Hypothyroidism              | 1.6  | Hypothyroidism              | 0.2 |
|            |                                          |       |                                                   |              |                                      | Ipilimumab only             | 1.6  | Ipilimumab only             | 0.3 |
|            |                                          |       |                                                   |              |                                      | + gp100                     | 1.5  | + gp100                     | 0   |
|            |                                          |       |                                                   |              |                                      | Hypopituitarism             | 1.2  | Hypopituitarism             | 0.8 |
|            |                                          |       |                                                   |              |                                      | Ipilimumab only             | 0.8  | Ipilimumab only             | 0.5 |
|            |                                          |       |                                                   |              |                                      | + gp100                     | 2.3  | + gp100                     | 1.5 |
|            |                                          |       |                                                   |              |                                      | Hypophysitis                | 0.8  | Hypophysitis                | 0.8 |
|            |                                          |       |                                                   |              |                                      | Ipilimumab only             | 0.5  | Ipilimumab only             | 0.5 |
|            |                                          |       |                                                   |              |                                      | + gp100                     | 1.5  | + gp100                     | 1.5 |
|            |                                          |       |                                                   |              |                                      | Adrenal insufficiency       | 1.0  | Adrenal insufficiency       | 0.4 |
|            |                                          |       |                                                   |              |                                      | Ipilimumab only             | 0.8  | Ipilimumab only             | 0.5 |
|            |                                          |       |                                                   |              |                                      | + gp100                     | 1.5  | + gp100                     | 0   |
|            |                                          |       |                                                   |              |                                      | Decrease in ACTH            | 0.4  | Decrease in ACTH            | 0.2 |
|            |                                          |       |                                                   |              |                                      | Ipilimumab only             | 0    | Ipilimumab only             | 0   |
|            |                                          |       |                                                   |              |                                      | + gp100                     | 1.5  | + gp100                     | 0.8 |
|            | Eggermont et al. <sup>[2]</sup><br>N=951 | III   | Stage III MM as adjuvant after complete resection | Naïve        | 3mg/kg Q3W (N=475)<br><br>vs Placebo | Any endocrine AE            | 29   | Any endocrine AE            | 5.5 |
|            |                                          |       |                                                   |              |                                      | Hypothyroidism              | 9.0  | Hypothyroidism              | 0.2 |
|            |                                          |       |                                                   |              |                                      | Hypophysitis                | 13.0 | Hypophysitis                | 5.1 |

|                                                                                  |      |                                      |              |                        |                                                                                                                       |                                                                                                                    |
|----------------------------------------------------------------------------------|------|--------------------------------------|--------------|------------------------|-----------------------------------------------------------------------------------------------------------------------|--------------------------------------------------------------------------------------------------------------------|
| <b>Kwon et al.</b> <sup>[3]</sup><br>N=799                                       | III  | Castration resistant prostate cancer | Radiotherapy | 3mg/kg Q3W (N=399)     | Any endocrine AE 5.3<br>Hypothyroidism 2.3<br>Hypopituitarism 0.8<br>Hypophysitis 1.0<br>Adrenal insufficiency 1.5    | Any endocrine AE 1.5<br>Hypothyroidism 0.5<br>Hypopituitarism 0.8<br>Hypophysitis 0.3<br>Adrenal insufficiency 0.5 |
| <b>Chiaroni Sileni et al.</b> <sup>[4]</sup><br>N=188                            | III  | mMM                                  | Pretreated   | 3mg/kg Q3W             | No endocrine AEs reported                                                                                             |                                                                                                                    |
| <b>Chiaroni Sileni et al.</b> <sup>[5]</sup><br>N=51                             |      | mMM                                  | Ipilimumab   | 3mg/kg Q3W (retreated) | Hypothyroidism 2.0                                                                                                    | Hypothyroidism 0                                                                                                   |
| <b>Altomonte et al.</b> <sup>[6]</sup><br>N=74                                   | IV   | mMM                                  | Pretreated   | 10mg/kg Q3W            | Any endocrine AE 5.4<br>Hypothyroidism 2.7<br>Hyperthyroidism 2.7                                                     | Any endocrine AE 0                                                                                                 |
| <b>Weber et al.</b> <sup>[7]</sup><br>N=59                                       | I    | mMM                                  | Naïve        | 10mg/kg Q3W            | No endocrine AEs reported                                                                                             |                                                                                                                    |
| <b>Slovin et al.</b> <sup>[8]</sup><br>N=71                                      | I/II | Castration-resistant prostate cancer | Pretreated   | 3-10mg/kg Q3W          | Any endocrine AE 12.7 *<br>Hypothyroidism 2.8<br>Hyperthyroidism 2.8<br>Hypophysitis 1.4<br>Adrenal insufficiency 1.4 | Any endocrine AE 0                                                                                                 |
| <b>Margolin et al.</b> <sup>[9]</sup><br>N=72<br>irAE occurring in >15% reported | II   | mMM with brain metastasis            | Pretreated   | 10mg/kg Q3W            | No endocrine AEs reported                                                                                             |                                                                                                                    |
| <b>Di Giacomo et al.</b> <sup>[10]</sup><br>N= 27                                | II   | mMM                                  | Pretreated   | 10mg/kg Q3W            | Hypothyroidism 7.4                                                                                                    | Hypothyroidism 0                                                                                                   |

|                                                |      |                   |                         |                                                                          |                                                                       |                                                              |
|------------------------------------------------|------|-------------------|-------------------------|--------------------------------------------------------------------------|-----------------------------------------------------------------------|--------------------------------------------------------------|
| <b>Sarnaik et al.</b> <sup>[11]</sup><br>N=75  | II   | mMM,<br>adjuvant  |                         | 3 (33%) or 10mg/kg (66%)<br>Q3W                                          | Any endocrine AE 16.0<br>Hypothyroidism 1.3<br>Hypophysitis 14.7      | Any endocrine AE 8.0<br>Hypothyroidism 0<br>Hypophysitis 8.0 |
| <b>Royal et al.</b> <sup>[12]</sup><br>N=27    | II   | Pancreatic cancer | Pretreated              | Ipilimumab<br>3mg/kg Q3W                                                 | Hypophysitis 3.7                                                      | Hypophysitis 3.7                                             |
| <b>O'Day et al.</b> <sup>[13]</sup><br>N=155   | II   | mMM               | Pretreated              | 10mg/kg Q3W                                                              | Any endocrine AE 5.8                                                  | Any endocrine AE 1.3                                         |
| <b>Hersh et al.</b> <sup>[14]</sup><br>N=76    | II   | mMM               | Naïve                   | Ipilimumab 3mg/kg Q3W<br>(n=37)<br>vs Ipilimumab +<br>Dacarbazine (n=35) | Adrenal insufficiency 1.4<br><br>(in Ipilimumab+DTIC arm)             |                                                              |
| <b>Wolchok et al.</b> <sup>[15]</sup><br>N=217 | II   | mMM               | Pretreated              | 0.3/3/10 mg/kg Q3W                                                       | Any endocrine AE 4.9                                                  | Any endocrine AE 2.1                                         |
| <b>Weber et al.</b> <sup>[16]</sup><br>N=115   | II   | mMM               | Pretreated and<br>naïve | 10mg/kg Q3W<br>+/- budesonide                                            | Any endocrine AE 9.6                                                  | Any endocrine AE 5.2                                         |
| <b>Yang et al.</b> <sup>[17]</sup><br>N=61     | II   | mRCC              | Pretreated and<br>naïve | Cohort 1: 1mg/kg<br>Cohort 2:<br>3mg/kg                                  | Any endocrine AE 4.9<br>Hypophysitis 3.3<br>Adrenal insufficiency 1.6 |                                                              |
| <b>Weber et al.</b> <sup>[18]</sup><br>N=88    | I/II | mMM               | Pretreated              | 2.8, 3 or 5mg/kg x3                                                      | Adrenal insufficiency 1.1                                             | Adrenal insufficiency 1.1                                    |
| <b>Attia et al.</b> <sup>[19]</sup><br>N=56    | I    | mMM               | Pretreated              | 10mg/kg Q3W<br>+ gp100                                                   | Hypophysitis 1.8                                                      | Hypophysitis 1.8                                             |

|                     |                                                                        |      |                   |            |                                                                    |                                                                                                       |                                                              |
|---------------------|------------------------------------------------------------------------|------|-------------------|------------|--------------------------------------------------------------------|-------------------------------------------------------------------------------------------------------|--------------------------------------------------------------|
|                     | <b>Maker et al.</b> <sup>[20]</sup><br>N=46                            | I/II | mMM               | Pretreated | Escalation doses 3-9 mg/kg                                         | Any endocrine AE 21.7<br>Hypothyroidism 2.2<br>Hypophysitis 17.4<br>5mg/kg 2.2<br>9mg/kg 15.2         | Any endocrine AE 17.4<br>Hypophysitis 17.4                   |
|                     | <b>Phan et al.</b> <sup>[21]</sup><br>N=14                             | II   | mMM               | Pretreated | 3mg/kg Q3W + gp100                                                 | Hypophysitis 7.1                                                                                      | Hypophysitis 7.1                                             |
|                     | <b>Ansell et al.</b> <sup>[22]</sup><br>N= 18                          | I    | B-cell NHL        | Pretreated | Escalation doses 1 to 3mg/kg Q4W                                   | Hypophysitis 6.0                                                                                      | Hypophysitis 0                                               |
|                     | <b>Ku et al.</b> <sup>[23]</sup><br>N=53                               | EAP  | mMM               | Pretreated | 10mg/kg Q3W                                                        | Any endocrine AE 5.7<br>Hypothyroidism 1.9<br>Hypophysitis 3.8                                        | Any endocrine AE 3.8<br>Hypothyroidism 0<br>Hypophysitis 3.8 |
|                     | <b>Small et al.</b> <sup>[24]</sup><br>N=14                            | I    | M Prostate cancer | Pretreated | 3mg/kg single dose                                                 | No endocrine AEs reported                                                                             |                                                              |
| <b>Tremelimumab</b> | <b>Camacho et al.</b> <sup>[25]</sup><br>N= 28 (Ph I)<br>N= 89 (Ph II) | I/II | mMM               | Pretreated | Ph I: 3, 6, or 10 mg/kg<br>Ph II: 10 mg/kg monthly or 15 mg/kg Q3M | Any endocrine AE 4.0<br>Ph I:<br>Thyroiditis (10mg/kg) 3.6<br>Ph II:<br>Hyperthyroidism (10mg/kg) 1.1 | Ph II:<br>Hyperthyroidism (10mg/kg) 1.1                      |
|                     | <b>Kirkwood et al.</b> <sup>[26]</sup><br>N= 251                       | II   | mMM               | Pretreated | 15mg/kg Q3M                                                        | Any endocrine AE 4.0<br>Thyroid disorders 3.2<br>Hypophysitis 0.4                                     |                                                              |

|                                                                                |    |                                       |            |                                                                                                                                         |                                                                                       |                    |
|--------------------------------------------------------------------------------|----|---------------------------------------|------------|-----------------------------------------------------------------------------------------------------------------------------------------|---------------------------------------------------------------------------------------|--------------------|
| <b>Ralph et al.</b> <sup>[27]</sup><br>N= 18                                   | II | Metastatic Gastric and Esophageal ADC | Pretreated | 15mg/kg Q3M                                                                                                                             | No endocrine AR reported                                                              |                    |
| <b>Chung et al.</b> <sup>[28]</sup><br>N=47                                    | II | mCRC                                  | Pretreated | 15mg/kg Q3M                                                                                                                             | Thyroiditis 2.1                                                                       |                    |
| <b>Ribas et al.</b> <sup>[29]</sup><br>N=39                                    | I  | mMM, RCC, colon                       | Pretreated | 0.01-15mg/kg, Q3M                                                                                                                       | Any endocrine AE 7.7<br>Hypothyroidism 2.6<br>Hyperthyroidism 2.6<br>Hypophysitis 2.6 | Any endocrine AE 0 |
| <b>Ribas et al.</b> <sup>[30]</sup><br>N=44<br>irAE occurring in >10% reported | I  | mMM                                   | -          | 15mg/kg Q3M                                                                                                                             | No endocrine AR reported                                                              |                    |
| <b>Aglietta et al.</b> <sup>[31]</sup><br>N=34                                 | Ib | Pancreatic                            | Naive      | Escalating doses 6,10, or 15 mg/kg on day 1 of each 84-day cycle max x4<br><br>+ Gemcitabine 1000 mg/m days 1, 8, and 15 of each 28-day | Hyperthyroidism 2.9                                                                   | Hyperthyroidism 0  |
| <b>Calabró et al.</b> <sup>[32]</sup><br>N=29                                  | II | Mesothelioma                          | Pretreated | 15mg/kg Q3M                                                                                                                             | No endocrine AR reported                                                              |                    |
| <b>Sangro et al.</b> <sup>[33]</sup><br>N=21                                   | II | HCC + Chronic Hepatitis C             | Pretreated | 15mg/kg Q3M                                                                                                                             | Hypothyroidism 5.0                                                                    | Hypothyroidism 0   |

|  |                                            |     |     |       |                                   |                                                                                                                          |                                                                                                                          |
|--|--------------------------------------------|-----|-----|-------|-----------------------------------|--------------------------------------------------------------------------------------------------------------------------|--------------------------------------------------------------------------------------------------------------------------|
|  | <b>Ribas et al.</b><br><small>[34]</small> | III | mMM | Naïve | 15mg/kg Q3M (N=325)<br><br>vs QMT | Any endocrine AE 8.3<br><br>Thyroid disorder 5.0<br>Hypothalamus/<br>Pituitary disorder 2.0<br>Adrenal insufficiency 1.0 | Any endocrine AE 3.0<br><br>Thyroid disorder 1.0<br>Hypothalamus/<br>Pituitary disorder 1.0<br>Adrenal insufficiency 1.0 |
|  | N=655                                      |     |     |       |                                   |                                                                                                                          |                                                                                                                          |

\* The subtypes listed do not add up to the total because not all the subtypes are provided by the authors.

### Supplement Table 1 Bibliography

- 1 Hodi FS, O'Day SJ, McDermott DF, et al. Improved survival with ipilimumab in patients with metastatic melanoma. *N Engl J Med* 2010;363:711–23.
- 2 Eggermont AMM, Chiarion-Sileni V, Grob J-J, et al. Adjuvant ipilimumab versus placebo after complete resection of high-risk stage III melanoma (EORTC 18071): a randomised, double-blind, phase 3 trial. *Lancet Oncol* 2015;16:522–30.
- 3 Kwon ED, Drake CG, Scher HI, et al. Ipilimumab versus placebo after radiotherapy in patients with metastatic castration-resistant prostate cancer that had progressed after docetaxel chemotherapy (CA184-043): a multicentre, randomised, double-blind, phase 3 trial. *Lancet Oncol* 2014;15:700–12.
- 4 Chiarion Sileni V, Pigozzo J, Ascierto PA, et al. Efficacy and safety of ipilimumab in elderly patients with pretreated advanced melanoma treated at Italian centres through the expanded access programme. *J Exp Clin Cancer Res* 2014;33:30.
- 5 Chiarion-Sileni V, Pigozzo J, Ascierto PA, et al. Ipilimumab retreatment in patients with pretreated advanced melanoma: the expanded access programme in Italy. *Br J Cancer* 2014;110:1721–6.
- 6 Altomonte M, Di Giacomo A, Queirolo P, et al. Clinical experience with ipilimumab 10 mg/kg in patients with melanoma treated at Italian centres as part of a European expanded access programme. *J Exp Clin Cancer Res* 2013;32:82.
- 7 Weber J, Hamid O, Amin A, et al. Randomized phase I pharmacokinetic study of ipilimumab with or without one of two different chemotherapy regimens in patients with untreated advanced melanoma. *Cancer Immun* 2013;13:7.
- 8 Slovin SF, Higoano CS, Hamid O, et al. Ipilimumab alone or in combination with radiotherapy in metastatic castration-resistant prostate cancer: results from an open-label, multicenter phase I/II study. *Ann Oncol* 2013;24:1813–21.
- 9 Margolin K, Ernstoff MS, Hamid O, et al. Ipilimumab in patients with melanoma and brain metastases: an open-label, phase 2 trial. *Lancet Oncol* 2012;13:459–65.
- 10 Di Giacomo AM, Danielli R, Calabrò L, et al. Ipilimumab experience in heavily pretreated patients with melanoma in an expanded access program at the University Hospital of Siena (Italy). *Cancer Immunol Immunother* 2011;60:467–77.
- 11 Sarnaik AA, Yu B, Yu D, et al. Extended dose ipilimumab with a peptide vaccine: immune correlates associated with clinical benefit in patients with resected high-risk stage IIIc/IV melanoma. *Clin Cancer Res* 2011;17:896–906.
- 12 Royal RE, Levy C, Turner K, et al. Phase 2 trial of single agent Ipilimumab (anti-CTLA-4) for locally advanced or metastatic pancreatic adenocarcinoma. *J Immunother* 2010;33:828–33.
- 13 O'Day SJ, Maio M, Chiarion-Sileni V, et al. Efficacy and safety of ipilimumab monotherapy in patients with pretreated advanced melanoma: a multicenter single-arm phase II study. *Ann Oncol* 2010;21:1712–7.
- 14 Hersh EM, O'Day SJ, Powderly J, et al. A phase II multicenter study of ipilimumab with or without dacarbazine in chemotherapy-naïve patients with advanced melanoma. *Invest New Drugs* 2011;29:489–98.
- 15 Wolchok JD, Neyns B, Linette G, et al. Ipilimumab monotherapy in patients with pretreated advanced melanoma: a randomised, double-blind, multicentre, phase 2,

- dose-ranging study. *Lancet Oncol* 2010;11:155–64.
- 16 Weber J, Thompson J a., Hamid O, et al. A randomized, double-blind, placebo-controlled, phase II study comparing the tolerability and efficacy of ipilimumab administered with or without prophylactic budesonide in patients with unresectable stage III or IV melanoma. *Clin Cancer Res* 2009;15:5591–5598.
- 17 Yang JC, Hughes M, Kammula U, et al. Ipilimumab (anti-CTLA4 antibody) causes regression of metastatic renal cell cancer associated with enteritis and hypophysitis. *J Immunother*;30:825–30.
- 18 Weber JS, O’Day S, Urba W, et al. Phase I/II study of ipilimumab for patients with metastatic melanoma. *J Clin Oncol* 2008;26:5950–6.
- 19 Attia P, Phan GQ, Maker A V, et al. Autoimmunity correlates with tumor regression in patients with metastatic melanoma treated with anti-cytotoxic T-lymphocyte antigen-4. *J Clin Oncol* 2005;23:6043–53.
- 20 Maker A V, Yang JC, Sherry RM, et al. Inpatient dose escalation of anti-CTLA-4 antibody in patients with metastatic melanoma. *J Immunother*;29:455–63.
- 21 Phan GQ, Yang JC, Sherry RM, et al. Cancer regression and autoimmunity induced by cytotoxic T lymphocyte-associated antigen 4 blockade in patients with metastatic melanoma. *Proc Natl Acad Sci U S A* 2003;100:8372–7.
- 22 Ansell SM, Hurvitz SA, Koenig PA, et al. Phase I study of ipilimumab, an anti-CTLA-4 monoclonal antibody, in patients with relapsed and refractory B-cell non-Hodgkin lymphoma. *Clin Cancer Res* 2009;15:6446–53.
- 23 Ku GY, Yuan J, Page DB, et al. Single-institution experience with ipilimumab in advanced melanoma patients in the compassionate use setting. *Cancer* 2010;116:1767–1775.
- 24 Small EJ, Tchekmedyan NS, Rini BI, et al. A pilot trial of CTLA-4 blockade with human anti-CTLA-4 in patients with hormone-refractory prostate cancer. *Clin Cancer Res* 2007;13:1810–5.
- 25 Camacho LH, Antonia S, Sosman J, et al. Phase I/II trial of tremelimumab in patients with metastatic melanoma. *J Clin Oncol* 2009;27:1075–81.
- 26 Kirkwood JM, Lorigan P, Hersey P, et al. Phase II trial of tremelimumab (CP-675,206) in patients with advanced refractory or relapsed melanoma. *Clin Cancer Res* 2010;16:1042–8.
- 27 Ralph C, Elkord E, Burt DJ, et al. Modulation of lymphocyte regulation for cancer therapy: a phase II trial of tremelimumab in advanced gastric and esophageal adenocarcinoma. *Clin Cancer Res* 2010;16:1662–72.
- 28 Chung KY, Gore I, Fong L, et al. Phase II study of the anti-cytotoxic T-lymphocyte-associated antigen 4 monoclonal antibody, tremelimumab, in patients with refractory metastatic colorectal cancer. *J Clin Oncol* 2010;28:3485–90.
- 29 Ribas A, Camacho LH, Lopez-Berestein G, et al. Antitumor activity in melanoma and anti-self responses in a phase I trial with the anti-cytotoxic T lymphocyte-associated antigen 4 monoclonal antibody CP-675,206. *J Clin Oncol* 2005;23:8968–77.
- 30 Ribas A, Chesney JA, Gordon MS, et al. Safety profile and pharmacokinetic analyses of the anti-CTLA4 antibody tremelimumab administered as a one hour infusion. *J Transl Med* 2012;10:236.
- 31 Aglietta M, Barone C, Sawyer MB, et al. A phase I dose escalation trial of tremelimumab (CP-675,206) in combination with gemcitabine in chemotherapy-naive patients with metastatic pancreatic cancer. *Ann Oncol* 2014;25:1750–5.
- 32 Calabrò L, Morra A, Fonsatti E, et al. Efficacy and safety of an intensified schedule of tremelimumab for chemotherapy-resistant malignant mesothelioma: an open-label, single-arm, phase 2 study. *Lancet Respir Med* 2015;3:301–9.
- 33 Sangro B, Gomez-Martin C, de la Mata M, et al. A clinical trial of CTLA-4 blockade with tremelimumab in patients with hepatocellular carcinoma and chronic hepatitis C. *J Hepatol* 2013;59:81–8.
- 34 Ribas A, Kefford R, Marshall MA, et al. Phase III randomized clinical trial comparing tremelimumab with standard-of-care chemotherapy in patients with advanced melanoma. *J Clin Oncol* 2013;31:616–22.

**Supplement Table 2:** Endocrine Adverse Events in studies with anti-PD1 antibodies.

| Agent         | First Author<br>N                      | Phase | Tumor type (% of total if available) | Pretreatment                     | Schedule                                                    | Endocrine AE, any grade (%) |      | Endocrine AE, grade 3-4 (%) |     |
|---------------|----------------------------------------|-------|--------------------------------------|----------------------------------|-------------------------------------------------------------|-----------------------------|------|-----------------------------|-----|
| Pembrolizumab | Hamid et al. <sup>1</sup><br>N= 135    | I/II  | mMM                                  | Ipilimumab (36%),<br>naïve (64%) | 10mg/kg Q2W (n=57) or<br>Q3W (n=56) or<br>2mg/kg Q3W (n=22) | Any Endocrine AE            | 8.1  | Any Endocrine AE            | 0.7 |
|               |                                        |       |                                      |                                  |                                                             | Hypothyroidism              | 8.1  | Hypothyroidism              | 0.7 |
|               |                                        |       |                                      |                                  |                                                             | 10mg/kg Q2W:                | 15.8 | 10mg/kg Q2W:                | 1.8 |
|               |                                        |       |                                      |                                  |                                                             | 10mg/kg Q3W:                | 1.8  | 10mg/kg Q3W:                | 0   |
|               |                                        |       |                                      |                                  |                                                             | 2mg/kg Q3W:                 | 4.5  | 2mg/kg Q3W:                 | 0   |
|               |                                        |       |                                      |                                  |                                                             | Hypophysitis                | 0    | Hypophysitis                | 0   |
|               | Robert C et al. <sup>2</sup><br>N= 834 | III   | mMM                                  | Naïve (66%),<br>Pretreated (33%) | 10mg/kg Q2W (n=278)<br>or Q3W (n=277)                       | Any Endocrine AE            | 15.1 | Any Endocrine AE            | 0.9 |
|               |                                        |       |                                      |                                  |                                                             | Hypothyroidism              | 9.4* | Hypothyroidism              | 0.1 |
|               |                                        |       |                                      |                                  |                                                             | 10mg/kg Q2W:                | 10.1 | 10mg/kg Q2W:                | 0.4 |
|               |                                        |       |                                      |                                  |                                                             | 10mg/kg Q3W:                | 8.7  | 10mg/kg Q3W:                | 0   |
|               |                                        |       |                                      |                                  |                                                             | Hyperthyroidism             | 4.9* | Hyperthyroidism             | 0   |
|               |                                        |       |                                      |                                  |                                                             | 10mg/kg Q2W:                | 6.5  |                             |     |
|               |                                        |       |                                      |                                  |                                                             | 10mg/kg Q3W:                | 3.2  |                             |     |
|               |                                        |       |                                      |                                  |                                                             | Hypophysitis                | 0.5  | Hypophysitis                | 0.3 |
|               |                                        |       |                                      |                                  |                                                             | 10mg/kg Q2W:                | 0.4  | 10mg/kg Q2W:                | 0.4 |
|               |                                        |       |                                      |                                  |                                                             | 10mg/kg Q3W:                | 0.7  | 10mg/kg Q3W:                | 0.4 |
|               |                                        |       |                                      |                                  |                                                             | Diabetes Mellitus           | 0.4  | Diabetes Mellitus           | 0.4 |
|               |                                        |       |                                      |                                  |                                                             | 10mg/kg Q2W:                | 0.4  | 10mg/kg Q2W:                | 0.4 |
|               |                                        |       |                                      |                                  |                                                             | 10mg/kg Q3W:                | 0.4  | 10mg/kg Q3W:                | 0.4 |



|  |                                                       |     |       |            |                                                                    |                                                                                                                                                                                                                                                                                                  |                                                                                                                                                                                                          |
|--|-------------------------------------------------------|-----|-------|------------|--------------------------------------------------------------------|--------------------------------------------------------------------------------------------------------------------------------------------------------------------------------------------------------------------------------------------------------------------------------------------------|----------------------------------------------------------------------------------------------------------------------------------------------------------------------------------------------------------|
|  |                                                       |     |       |            | Ipilimumab<br>3mg/kg Q3W<br>(n=256)                                | Hypothyroidism 0.8<br>Hyperthyroidism 2.3<br>Hypophysitis 1.6                                                                                                                                                                                                                                    | Hypothyroidism 0<br>Hyperthyroidism 0.8<br>Hypophysitis 0.8                                                                                                                                              |
|  | <b>Garon EB et al.</b><br><sup>3</sup><br><br>N = 495 | III | NSCLC |            | 10mg/kg<br>Q2W (n=202) or<br>Q3W (n=287) or<br>2mg/kg Q3W<br>(n=6) | Any Endocrine AE 8.7<br><br>Hypothyroidism 6.9<br>10mg/kg Q2W: 9.4<br>10mg/kg Q3W: 4.9<br>2mg/kg Q3W: 16.7<br><br>Hyperthyroidism 1.8<br>10mg/kg Q2W: 1.5<br>10mg/kg Q3W: 2.1<br>2mg/kg Q3W: 0                                                                                                   | Any Endocrine AE 0.2<br><br>Hypothyroidism 0.2                                                                                                                                                           |
|  | <b>Robert C et al.</b><br><sup>4</sup><br><br>N=173   | I   | mMM   | Ipilimumab | 10mg/kg (n=84)<br>or<br>2mg/kg (n=89)<br>Q3W                       | Any Endocrine AE 6.9<br><br>Hypothyroidism 4.0<br>10mg/kg Q3W: 2.4<br>2mg/kg Q3W: 5.6<br><br>Hyperthyroidism 1.2 †<br><br>10mg/kg Q3W: 2.4<br>2mg/kg Q3W: 1.1<br><br>Hypophysitis 1.2<br>10mg/kg Q3W: 0<br>2mg/kg Q3W: 2.2<br><br>Adrenal insufficiency 0.6<br>10mg/kg Q3W: 0<br>2mg/kg Q3W: 1.1 | Any Endocrine AE 0.6<br><br>Hypothyroidism 0<br><br>Hyperthyroidism 0<br><br>Hypophysitis 0.6<br>10mg/kg Q3W: 0<br>2mg/kg Q3W: 1.1<br><br>Adrenal insufficiency 0.6<br>10mg/kg Q3W: 0<br>2mg/kg Q3W: 1.1 |

|  |                                              |    |                                                                      |            |                                         |                                                                                                                                                                                                             |                                                                                                                        |
|--|----------------------------------------------|----|----------------------------------------------------------------------|------------|-----------------------------------------|-------------------------------------------------------------------------------------------------------------------------------------------------------------------------------------------------------------|------------------------------------------------------------------------------------------------------------------------|
|  | <b>Ribas A et al.</b> <sup>5</sup><br>N= 540 | II | mMM                                                                  | Ipilimumab | 10mg/kg (33%) or<br>2mg/kg (33%)<br>Q3W | Any Endocrine AE 10.4<br>Hypothyroidism 7.3<br>10mg/kg Q3W: 8.0<br>2mg/kg Q3W: 6.0<br>Hyperthyroidism 2.5<br>10mg/kg Q3W: 1.0<br>2mg/kg Q3W: 4.0<br>Hypophysitis 0.6<br>10mg/kg Q3W: 0.6<br>2mg/kg Q3W: 0.6 | Any Endocrine AE 1.0<br>Hypothyroidism 0<br>Hyperthyroidism 0<br>Hypophysitis 0.3<br>10mg/kg Q3W: 0<br>2mg/kg Q3W: 0.6 |
|  | <b>Plimack et al.</b> <sup>6</sup><br>N= 33  | Ib | mUrothelial cancer                                                   | Pretreated | 10mg/kg Q2W                             | No endocrine AEs reported.                                                                                                                                                                                  |                                                                                                                        |
|  | <b>Goldberg et al.</b> <sup>7</sup><br>N= 16 | Ib | NSCLC or MM with<br>brain metastasis                                 | Pretreated | 10mg/kg Q2W                             | No endocrine Aes reported.                                                                                                                                                                                  |                                                                                                                        |
|  | <b>Doi et al.</b> <sup>8</sup><br>N= 23      | Ib | Esophageal carcinoma                                                 | Pretreated | 10mg/kg Q2W                             | Any Endocrine AE 13.0<br>Hypothyroidism 8.7<br>Adrenal insufficiency 4.3                                                                                                                                    | Any Endocrine AE 0                                                                                                     |
|  | <b>Seiwert et al.</b> <sup>9</sup><br>N=132  | Ib | Head and Neck<br>Squamous Cell<br>Cancer, recurrent or<br>metastatic | Pretreated | 200mg Q3W                               | Any Endocrine AE 13.0<br>Hypothyroidism 10.6<br>Thyroiditis 2.3                                                                                                                                             | Any Endocrine AE 0                                                                                                     |

|                  |                                                |     |                                                 |            |                                         |                                                                                            |                                 |                                                                                            |                           |
|------------------|------------------------------------------------|-----|-------------------------------------------------|------------|-----------------------------------------|--------------------------------------------------------------------------------------------|---------------------------------|--------------------------------------------------------------------------------------------|---------------------------|
|                  | <b>Varga et al.</b> <sup>10</sup><br>N=26      | Ib  | Ovarian, fallopian tube or peritoneal carcinoma | Pretreated | 10mg/kg Q2W                             | Any Endocrine AE<br>Hypothyroidism<br>Hyperthyroidism                                      | 19.2<br>11.5<br>7.7             | Any Endocrine AE                                                                           | 0                         |
|                  | <b>Ott et al.</b> <sup>11</sup><br>N=20        | Ib  | SCLC                                            | Pretreated | 10mg/kg Q2W                             | Thyroiditis                                                                                | 5.0                             | Thyroiditis                                                                                | 0                         |
|                  | <b>Le et al.</b> <sup>12</sup><br>N=41         | II  | Metastatic colorectal carcinoma,                | Pretreated | 10mg/kg Q2W                             | Any Endocrine AE<br>Hypothyroidism<br>Hypophysitis<br>Thyroiditis                          | 10<br>NS<br>NS<br>NS            |                                                                                            |                           |
| <b>Nivolumab</b> | <b>Topalian et al.</b> <sup>13</sup><br>N= 107 | I   | mMM                                             | Pretreated | Escalating doses<br>1, 3, 10mg per kg   | Any Endocrine AE<br>Hypothyroidism<br>Thyroiditis<br>Hypophysitis                          | 7.4<br>5.6<br>0.9<br>0.9        | Hypothyroidism                                                                             | 0.9                       |
|                  | <b>Ansell et al.</b> <sup>14</sup><br>N=23     | I   | Hodgkin's Lymphoma                              | Pretreated | 3mg/kg Q2W                              | Hypothyroidism                                                                             | 8.7                             | Hypothyroidism                                                                             | 0                         |
|                  | <b>Brahmer et al.</b> <sup>15</sup><br>N=272   | III | NSCLC                                           | Pretreated | 3mg/kg Q2W<br>(N=135)<br>vs Docetaxel   | Any Endocrine AE<br>Hypothyroidism                                                         | 3.8<br>3.8                      | Any Endocrine AE                                                                           | 0                         |
|                  | <b>Robert C et al.</b> <sup>16</sup><br>N= 418 | III | mMM negative BRAF                               | Naïve      | 3mg/kg Q2W<br>(N=206)<br>vs Dacarbazine | Any Endocrine AE<br>Hypothyroidism<br>Hyperthyroidism<br>Hypophysitis<br>Diabetes Mellitus | 8.8<br>4.4<br>3.4<br>0.5<br>0.5 | Any Endocrine AE<br>Hypothyroidism<br>Hyperthyroidism<br>Hypophysitis<br>Diabetes Mellitus | 0.5<br>0<br>0<br>0.5<br>0 |

|  |                                               |     |                                                                  |                                   |                                           |                                                                                                               |                                                                                            |
|--|-----------------------------------------------|-----|------------------------------------------------------------------|-----------------------------------|-------------------------------------------|---------------------------------------------------------------------------------------------------------------|--------------------------------------------------------------------------------------------|
|  | <b>Rizvi et al.</b> <sup>17</sup><br>N=117    | II  | NSCLC                                                            | Pretreated                        | 3mg/kg Q2W                                | Any Endocrine AE 6.0<br>Hypothyroidism 2.6<br>Thyroiditis 0.9<br>Adrenal insufficiency 0.9                    | Any Endocrine AE 0.9<br>Hypothyroidism 0<br>Thyroiditis 0<br>Adrenal insufficiency 0.9     |
|  | <b>Weber et al.</b> <sup>18</sup><br>N=405    | III | mMM                                                              | Ipilimumab                        | 3mg/kg Q2W<br>(N=268)                     | Any Endocrine AE 7.8<br>Hypothyroidism 5.6<br>Hyperthyroidism 1.9                                             | Any Endocrine AE 0                                                                         |
|  | <b>Weber et al.</b> <sup>19</sup><br>N=90     | I   | mMM                                                              | Ipilimumab Naïve<br>or Ipilimumab | 3mg/kg Q2W                                | Any Endocrine AE 13.3<br>Hypothyroidism 10<br>Thyroiditis 2.2<br>Hypopituitarism 1.1                          | Any Endocrine AE 0                                                                         |
|  | <b>Topalian et al.</b> <sup>20</sup><br>N=296 | I   | mMM, NSCLC, mRCC,<br>castration resistant<br>prostate cancer,CRC | Pretreated                        | Escalating doses<br>0.1 to 10mg/kg<br>Q2W | Any Endocrine AE 3.4<br>Hypothyroidism 2.4<br>Hyperthyroidism 1.0                                             | Any Endocrine AE 0.3                                                                       |
|  | <b>Brahmer et al.</b> <sup>21</sup><br>N=39   | I   | mMM, NSCLC, mRCC,<br>Prostate, CRC                               | Pretreated                        | Escalating doses<br>0.3 to10mg/kg<br>Q2W  | Hypothyroidism 2.4                                                                                            | Hypothyroidism 0                                                                           |
|  | <b>Weber et al.</b> <sup>22</sup><br>N= 92    | II  | mMM                                                              | Ipilimumab                        | 3mg/kg Q2W                                | Any Endocrine AE 38<br>Hypothyroidism 12.0<br>Hyperthyroidism 6.5<br>Adrenal insufficiency 3.3<br>Others 16.3 | Any Endocrine AE 2.2<br>Hypothyroidism 0<br>Hyperthyroidism 0<br>Adrenal insufficiency 2.2 |

|                                                 |         |                                                     |            |                                            |                                                       |                      |                                                       |                    |
|-------------------------------------------------|---------|-----------------------------------------------------|------------|--------------------------------------------|-------------------------------------------------------|----------------------|-------------------------------------------------------|--------------------|
| <b>Hamanishi et al.</b> <sup>23</sup><br>N=20   | I       | Ovarian cancer                                      | Pretreated | 1mg/kg (n=10) or<br>3mg/kg (n=10)<br>Q2W   | Hypothyroidism<br>1 mg/kg<br>3 mg/kg                  | 40<br>40<br>40       | Hypothyroidism                                        | 0                  |
| <b>Nishio et al.</b> <sup>24</sup><br>N=111     | II      | Squamous (N=35) and<br>non squamous (N=76)<br>NSCLC | Pretreated | 3mg/kg Q2W                                 | Any Endocrine AE<br>Hypothyroidism                    | 13.5<br>6.3          | Any Endocrine AE                                      | 0                  |
| <b>Bauer et al.</b> <sup>25</sup><br>N=824      | IIIb/IV | NSCLC                                               | Pretreated | 3mg/kg Q2W                                 | Any Endocrine AE<br>Hypothyroidism<br>Hyperthyroidism | 4.6<br>3.5<br>1.0    | Any Endocrine AE<br>Hypothyroidism<br>Hyperthyroidism | 0.2<br>0.1<br>0.1  |
| <b>Gettinger et al.</b> <sup>26</sup><br>N=52   | I       | NSCLC                                               | Naïve      | 3mg/kg Q2W                                 | Any Endocrine AE                                      | 14                   | Any Endocrine AE                                      | 0                  |
| <b>El-Khoueiry et al.</b> <sup>27</sup><br>N=47 | I       | HCC                                                 | Pretreated | Escalating doses                           | No endocrine AEs reported                             |                      |                                                       |                    |
| <b>Paz-Ares et al.</b> <sup>28</sup><br>N=582   | III     | NSCLC                                               | Pretreated | 3mg/kg Q2W<br>(N=292)<br>vs Docetaxel      | Hypothyroidism                                        | 7.0                  |                                                       |                    |
| <b>Motzer et al.</b> <sup>29</sup><br>N=168     | II      | mRCC                                                | Pretreated | 0.3mg/kg or<br>3mg/kg or<br>10mg/kg<br>Q2W | Any Endocrine AE<br>0.3mg/kg<br>3mg/kg or<br>10mg/kg  | 9.0<br>5<br>11<br>11 | Any Endocrine AE<br>0.3mg/kg<br>3mg/kg or<br>10mg/kg  | 1.2<br>0<br>0<br>4 |

|                    |                                             |    |                               |                                                      |                            |                  |      |  |
|--------------------|---------------------------------------------|----|-------------------------------|------------------------------------------------------|----------------------------|------------------|------|--|
| <b>Pidilizumab</b> | <b>Armand et al.</b> <sup>30</sup><br>N= 66 | II | Diffuse large B cell lymphoma | Pretreated, autologous hematopoietic stem-cell trans | 1.5 mg/kg every 42 days    | Hyperglycemia    | 13.6 |  |
|                    | <b>Atkins et al.</b> <sup>31</sup><br>N=102 | II | mMM                           | Ipilimumab (52%),                                    | 1.5 mg/kg or 6 mg/kg       | Hyperglycemia    | 2.0  |  |
|                    | <b>Berger et al.</b> <sup>32</sup><br>N=17  | I  | Hematologic malignancies      | Pretreated                                           | Escalating doses 1-6 mg/kg | No endocrine AEs |      |  |

\* Data related to hypothyroidism and hyperthyroidism is different in the tables supplied in the supplementary appendix. We have used the data in the article.

#### Bibliography of Supplemental Table 2

- 1 Hamid O, Robert C, Daud A, et al. Safety and tumor responses with lambrolizumab (anti-PD-1) in melanoma. *N Engl J Med* 2013;369:134–44.
- 2 Robert C, Schachter J, Long G V., et al. Pembrolizumab versus Ipilimumab in Advanced Melanoma. *N Engl J Med* 2015;:150419053123009.
- 3 Garon EB, Rizvi NA, Hui R, et al. Pembrolizumab for the Treatment of Non-Small-Cell Lung Cancer. *N Engl J Med* 2015;372:2018–28.
- 4 Robert C, Ribas A, Wolchok JD, et al. Anti-programmed-death-receptor-1 treatment with pembrolizumab in ipilimumab-refractory advanced melanoma: a randomised dose-comparison cohort of a phase 1 trial. *Lancet* 2014;384:1109–17.
- 5 Ribas A, Puzanov I, Dummer R, et al. Pembrolizumab versus investigator-choice chemotherapy for ipilimumab-refractory melanoma (KEYNOTE-002): a randomised, controlled, phase 2 trial. *Lancet Oncol* 2015. doi:10.1016/S1470-2045(15)00083-2.
- 6 Plimack ER, Bellmunt J, Gupta S, et al. Pembrolizumab (MK-3475) for advanced urothelial cancer: Updated results and biomarker analysis from KEYNOTE-012. *ASCO Meet Abstr* 2015;33 :4502.
- 7 Goldberg SB, Gettinger SN, Mahajan A, et al. Activity and safety of pembrolizumab in patients with metastatic non-small cell lung cancer with untreated brain metastases. *ASCO Meet Abstr* 2015;33 :8035.
- 8 Doi T, Piha-Paul SA, Jalal SI, et al. Pembrolizumab (MK-3475) for patients (pts) with advanced esophageal carcinoma: Preliminary results from KEYNOTE-028. *ASCO Meet Abstr* 2015;33 :4010.
- 9 Seiwert TY, Haddad RI, Gupta S, et al. Antitumor activity and safety of pembrolizumab in patients (pts) with advanced squamous cell carcinoma of the head and neck (SCCHN): Preliminary results from KEYNOTE-012 expansion cohort. *ASCO Meet Abstr* 2015;33 :LBA6008.
- 10 Varga A, Piha-Paul SA, Ott PA, et al. Antitumor activity and safety of pembrolizumab in patients (pts) with PD-L1 positive advanced ovarian cancer: Interim results from a phase Ib study. *ASCO Meet Abstr* 2015;33 :5510.
- 11 Ott PA, Fernandez MEE, Hiret S, et al. Pembrolizumab (MK-3475) in patients (pts) with extensive-stage small cell lung cancer (SCLC): Preliminary safety and efficacy

results from KEYNOTE-028. ASCO Meet Abstr 2015;33 :7502.

- 12 Le DT, Uram JN, Wang H, et al. PD-1 Blockade in Tumors with Mismatch-Repair Deficiency. *N Engl J Med* 2015;372:2509–20.
- 13 Topalian SL, Sznol M, McDermott DF, et al. Survival, durable tumor remission, and long-term safety in patients with advanced melanoma receiving nivolumab. *J Clin Oncol* 2014;32:1020–1030.
- 14 Ansell SM, Lesokhin AM, Borrello I, et al. PD-1 Blockade with Nivolumab in Relapsed or Refractory Hodgkin’s Lymphoma. *N Engl J Med* 2014;372:141206100011003.
- 15 Brahmer J, Reckamp KL, Baas P, et al. Nivolumab versus Docetaxel in Advanced Squamous-Cell Non-Small-Cell Lung Cancer. *N Engl J Med* 2015;373:123–35.
- 16 Robert C, Long G V., Brady B, et al. Nivolumab in Previously Untreated Melanoma without BRAF Mutation. *N Engl J Med* 2014;372:141116004513004.
- 17 Rizvi NA, Mazières J, Planchard D, et al. Activity and safety of nivolumab, an anti-PD-1 immune checkpoint inhibitor, for patients with advanced, refractory squamous non-small-cell lung cancer (CheckMate 063): a phase 2, single-arm trial. *Lancet Oncol* 2015;16:257–65.
- 18 Weber JS, D’Angelo SP, Minor D, et al. Nivolumab versus chemotherapy in patients with advanced melanoma who progressed after anti-CTLA-4 treatment (CheckMate 037): a randomised, controlled, open-label, phase 3 trial. *Lancet Oncol* 2015;16:375–84.
- 19 Weber JS, Kudchadkar RR, Yu B, et al. Safety, efficacy, and biomarkers of nivolumab with vaccine in ipilimumab-refractory or -naive melanoma. *J Clin Oncol* 2013;31:4311–8.
- 20 Topalian SL, Hodi FS, Brahmer JR, et al. Safety, activity, and immune correlates of anti-PD-1 antibody in cancer. *N Engl J Med* 2012;366:2443–54.
- 21 Brahmer JR, Drake CG, Wollner I, et al. Phase I study of single-agent anti-programmed death-1 (MDX-1106) in refractory solid tumors: safety, clinical activity, pharmacodynamics, and immunologic correlates. *J Clin Oncol* 2010;28:3167–75.
- 22 Weber JS, Gibney GT, Yu B, et al. Survival, biomarker, and toxicity analysis of nivolumab (NIVO) in patients that progressed on ipilimumab (IPI). ASCO Meet Abstr 2015;33 :9055.
- 23 Hamanishi J, Mandai M, Ikeda T, et al. Durable tumor remission in patients with platinum-resistant ovarian cancer receiving nivolumab. ASCO Meet Abstr 2015;33 :5570.
- 24 Nishio M, Hida T, Nakagawa K, et al. Phase II studies of nivolumab (anti-PD-1, BMS-936558, ONO-4538) in patients with advanced squamous (sq) or nonsquamous (non-sq) non-small cell lung cancer (NSCLC). ASCO Meet Abstr 2015;33 :8027.
- 25 Bauer TM, McCleod M, Chandler JC, et al. An ongoing phase IIIb/IV safety trial of nivolumab (NIVO) in patients (pts) with advanced or metastatic non-small-cell lung cancer (NSCLC) who progressed after receiving 1 or more prior systemic regimens. ASCO Meet Abstr 2015;33 :3013.
- 26 Gettinger SN, Hellmann MD, Shepherd FA, et al. First-line monotherapy with nivolumab (NIVO; anti-programmed death-1 [PD-1]) in advanced non-small cell lung cancer (NSCLC): Safety, efficacy and correlation of outcomes with PD-1 ligand (PD-L1) expression. ASCO Meet Abstr 2015;33 :8025.
- 27 El-Khoueiry AB, Melero I, Crocenzi TS, et al. Phase I/II safety and antitumor activity of nivolumab in patients with advanced hepatocellular carcinoma (HCC): CA209-040. ASCO Meet Abstr 2015;33 :LBA101.
- 28 Paz-Ares L, Horn L, Borghaei H, et al. Phase III, randomized trial (CheckMate 057) of nivolumab (NIVO) versus docetaxel (DOC) in advanced non-squamous cell (non-SQ) non-small cell lung cancer (NSCLC). ASCO Meet Abstr 2015;33 :LBA109.
- 29 Motzer RJ, Rini BI, McDermott DF, et al. Nivolumab for Metastatic Renal Cell Carcinoma: Results of a Randomized Phase II Trial. *J Clin Oncol* 2015;33:1430–7.
- 30 Armand P, Nagler A, Weller E a., et al. Disabling immune tolerance by programmed death-1 blockade with pidilizumab after autologous hematopoietic stem-cell transplantation for diffuse large b-cell lymphoma: Results of an international phase II trial. *J Clin Oncol* 2013;31:4199–4206.
- 31 Atkins MB, Kudchadkar RR, Sznol M, et al. Phase 2, multicenter, safety and efficacy study of pidilizumab in patients with metastatic melanoma. ASCO Meet Abstr 2014;32 :9001.
- 32 Berger R, Rotem-Yehudar R, Slama G, et al. Phase I safety and pharmacokinetic study of CT-011, a humanized antibody interacting with PD-1, in patients with advanced hematologic malignancies. *Clin Cancer Res* 2008;14:3044–51.

**Table S3.** Endocrine Adverse Events in studies with anti-PDL1 antibodies.

| Agent        | First Author<br>N<br>Comment         | Phase | Tumor type (% of total<br>if available)                      | Pretreatment      | Schedule                         | Endocrine AE,<br>any grade (%) | Endocrine AE,<br>grade 3-4 (%) |
|--------------|--------------------------------------|-------|--------------------------------------------------------------|-------------------|----------------------------------|--------------------------------|--------------------------------|
| Avelumab     | Kelly et al. <sup>1</sup><br>N= 480  | I     | Advanced or metastatic<br>solid tumors                       | Pretreated        | 10mg Q3W                         | Hypothyroidism 4.2             |                                |
|              | Yamada et al. <sup>2</sup><br>N= 20  | I     | Gastric cancer                                               | Pretreated        | 10mg Q3W                         | Hyperthyroidism 10             |                                |
|              | Shitara et al. <sup>3</sup><br>N= 17 | I     | Advanced solid tumors                                        | Pretreated        | Dose scalation<br>3,10, 20mg Q3W | No endocrine AEs reported      |                                |
|              | Disis et al. <sup>4</sup><br>N=75    | Ib    | Ovarian Cancer                                               | Pretreated        | 10mg Q2W                         | Hypothyroidism 5.3             |                                |
|              | Gulley et al. <sup>5</sup><br>N=184  | Ib    | NSCLC                                                        | Platinum-based QT | 10mg Q2W                         | Hypothyroidism 6.5             |                                |
| Atezolizumab | Powles et al. <sup>6</sup><br>N=68   | I     | Metastatic solid tumors<br>or haematological<br>malignancies | Pretreated        | 15 mg/kg IV Q3W                  | Hypothyroidism 1.5             |                                |
|              | Kim et al. <sup>7</sup><br>N=85      | I     | mUBC                                                         | Pretreated        | 15 mg/kg IV Q3W                  | No endocrine AEs reported      |                                |



|  |                                                                               |    |                                    |            |                                             |                           |                   |
|--|-------------------------------------------------------------------------------|----|------------------------------------|------------|---------------------------------------------|---------------------------|-------------------|
|  | <b>Hamid et al.</b> <sup>8</sup><br>N=44<br>irAE occurring in >15% reported   | I  | mMM                                | Pretreated | Escalating doses<br>0.01-20 mg/kg IV<br>Q3W | Hyperglycemia 9.0         | Hyperglycemia 9.0 |
|  | <b>Tabernero et al.</b> <sup>9</sup><br>N=20                                  | I  | Solid tumors                       | Pretreated | Escalating doses<br>0.01-20 mg/kg IV<br>Q3W | No endocrine AEs reported |                   |
|  | <b>Cho et al.</b> <sup>10</sup><br>N= 55<br>irAE occurring in >16% reported   | I  | mRCC                               | Pretreated | Escalating doses<br>0.01-20 mg/kg IV<br>Q3W | Hyperglycemia 6.0         | Hyperglycemia 6.0 |
|  | <b>Spigel et al.</b> <sup>11</sup><br>N=52                                    | I  | NSCLC                              | Pretreated | Escalating doses<br>0.01-20 mg/kg IV<br>Q3W | Hyperglycemia 4.0         | Hyperglycemia 4.0 |
|  | <b>Petrylak et al.</b> <sup>12</sup><br>N=92                                  | I  | UBC                                | Pretreated | Escalating doses<br>0.01-20 mg/kg IV<br>Q3W | Hypophysitis 1.0          | Hypophysitis 1.0  |
|  | <b>Spira et al.</b> <sup>13</sup><br>N=287                                    | II | NSCLC                              | Pretreated | 1200mg IV Q3W<br><br>Vs Docetaxel           | Hypothyroidism 6.0        | Hypothyroidism 0  |
|  | <b>Herbst et al.</b> <sup>14</sup><br>N=171<br>irAE occurring >17.5% reported | I  | mMM (26%), mRCC (32%), NSCLC (30%) | Pretreated | Escalating doses<br>0.01-20 mg/kg IV<br>Q3W | Hyperglycemia 5.0         | Hyperglycemia 5.0 |

|                   |                                                  |   |                                                                                                   |            |                                                              |                                                                                                                                                                            |                                                                                                                                         |
|-------------------|--------------------------------------------------|---|---------------------------------------------------------------------------------------------------|------------|--------------------------------------------------------------|----------------------------------------------------------------------------------------------------------------------------------------------------------------------------|-----------------------------------------------------------------------------------------------------------------------------------------|
| <b>Durvalumab</b> | <b>Segal et al.</b> <sup>15</sup><br>N=346       | I | NSCLC, SCCHN, MM, Pancreatic, Gastroesophageal, TNBC, HCC                                         | Pretreated | 10mg/kg Q2W                                                  | Any Endocrine AE 3.8<br>Hypothyroidism 2.3<br>Hyperthyroidism 1.2<br>Hyperglycemia 0.3                                                                                     | Any Endocrine AE 0.6<br>Hypothyroidism 0.3<br>Hyperthyroidism 0<br>Hyperglycemia 0.3                                                    |
|                   | <b>Lutzky et al.</b> <sup>16</sup><br>N=27       | I | NSCLC, MM, RCC, CRC                                                                               | Pretreated | Escalating doses 0.1-10mg/kg Q2W or 15mg/kg Q3W              | Hypothyroidism 2.3                                                                                                                                                         |                                                                                                                                         |
|                   | <b>Iguchi et al.</b> <sup>17</sup><br>N= 22      | I | Solid tumors                                                                                      | Pretreated | Escalating doses 1-10mg/kg Q2W or 15mg/kg Q3W or 20mg/kg Q4W | Hypothyroidism 4.5                                                                                                                                                         |                                                                                                                                         |
|                   | <b>Segal et al.</b> <sup>18</sup><br>N=62        | I | SCCHN                                                                                             | Pretreated | 10mg/kg Q2W                                                  | Hypothyroidism 4.8                                                                                                                                                         |                                                                                                                                         |
|                   | <b>Rizvi et al.</b> <sup>19</sup><br>N=228       | I | NSCLC                                                                                             | Pretreated | 10mg/kg q2w                                                  | Any Endocrine AE 11.0<br>Hypothyroidism 3.5<br>Hyperthyroidism 3.9<br>Thyroiditis 1.3<br>Adrenal insufficiency 0.4<br>Endocrine disorder 1.8                               | Any Endocrine AE 0.7<br>Hypothyroidism 0<br>Hyperthyroidism 0.4<br>Thyroiditis 0.4<br>Adrenal insufficiency 0<br>Endocrine disorder 0.4 |
| <b>BMS-936559</b> | <b>Brahmer JR et al.</b> <sup>20</sup><br>N= 207 | I | NSCLC (36%), mMM (27%), RCC (8%), ovary (8%), CRC (9%), páncreas, (7%), gastric (3%), breast (2%) | Pretreated | BMS-936559                                                   | Any Endocrine AE 3.9<br>Hypothyroidism 2.9<br>3 mg/kg Q2W: 2<br>10 mg/kg Q2W: 4<br>Adrenal insufficiency 1.0<br>3 mg/kg Q2W: 2<br>10 mg/kg Q2W: 1<br>Diabetes Mellitus 0.5 | Any Endocrine AE 0.5<br>Hypothyroidism 0<br>Adrenal insufficiency 0.5<br>3 mg/kg Q2W: 2<br>10 mg/kg Q2W: 0                              |

|  |  |  |  |  |  |  |                   |     |
|--|--|--|--|--|--|--|-------------------|-----|
|  |  |  |  |  |  |  | Diabetes Mellitus | 0.5 |
|--|--|--|--|--|--|--|-------------------|-----|

Bibliography of Supplemental Table 3

1. Kelly K, Patel MR, Infante JR, et al. Avelumab (MSB0010718C), an anti-PD-L1 antibody, in patients with metastatic or locally advanced solid tumors: assessment of safety and tolerability in a phase I, open-label expansion study. *J Clin Oncol.* 2015;33 (15\_suppl ):3044.
2. Yamada Y, Nishina T, Iwasa S, et al. A phase I dose expansion trial of avelumab (MSB0010718C), an anti-PD-L1 antibody, in Japanese patients with advanced gastric cancer. *J Clin Oncol.* 2015;33 (15\_suppl ):4047.
3. Shitara K, Yamada Y, Yoh K, et al. Phase I, open-label, multi-ascending dose trial of avelumab (MSB0010718C), an anti-PD-L1 monoclonal antibody, in Japanese patients with advanced solid tumors. *J Clin Oncol.* 2015;33(15\_suppl):3023.
4. Disis ML, Patel MR, Pant S, et al. Avelumab (MSB0010718C), an anti-PD-L1 antibody, in patients with previously treated, recurrent or refractory ovarian cancer: A phase Ib, open-label expansion trial. *J Clin Oncol.* 2015;33 (15\_suppl ):5509.
5. Gulley JL, Spigel D, Kelly K, et al. Avelumab (MSB0010718C), an anti-PD-L1 antibody, in advanced NSCLC patients: A phase 1b, open-label expansion trial in patients progressing after platinum-based chemotherapy. *J Clin Oncol.* 2015;33 (15\_suppl ):8034.
6. Powles T, Eder JP, Fine GD, et al. MPDL3280A (anti-PD-L1) treatment leads to clinical activity in metastatic bladder cancer. *Nature.* 2014;515(7528):558-562.
7. Kim JW, Bellmunt J, Powles T, et al. Clinical activity, safety, and biomarkers of MPDL3280A in metastatic urothelial bladder cancer: Additional analysis from phase IA study. *J Clin Oncol.* 33 (7\_suppl ):297.
8. Hamid O, Sosman JA, Lawrence DP, et al. Clinical activity, safety, and biomarkers of MPDL3280A, an engineered PD-L1 antibody in patients with locally advanced or metastatic melanoma (mM). *J Clin Oncol.* 2013;31 (15\_suppl ):9010.
9. Taberero J, Powderly JD, Hamid O, et al. Clinical activity, safety, and biomarkers of MPDL3280A, an engineered PD-L1 antibody in patients with locally advanced or metastatic CRC, gastric cancer (GC), SCCHN, or other tumors. *J Clin Oncol.* 2013;31 (15\_suppl ):3622.
10. Cho DC, Sosman JA, Sznol M, et al. Clinical activity, safety, and biomarkers of MPDL3280A, an engineered PD-L1 antibody in patients with metastatic renal cell carcinoma (mRCC). *J Clin Oncol.* 2013;31 (15\_suppl ):4505.
11. Spigel DR, Gettinger SN, Horn L, et al. Clinical activity, safety, and biomarkers of MPDL3280A, an engineered PD-L1 antibody in patients with locally advanced or metastatic non-small cell lung cancer (NSCLC). *J Clin Oncol.* 2013;31 (15\_suppl ):8008.
12. Petrylak DP, Powles T, Bellmunt J, et al. A phase Ia study of MPDL3280A (anti-PDL1): Updated response and survival data in urothelial bladder cancer (UBC). *J Clin Oncol.* 2015;33 (15\_suppl ):4501.
13. Spira AI, Park K, Mazieres J, et al. Efficacy, safety and predictive biomarker results from a randomized phase II study comparing MPDL3280A vs docetaxel in 2L/3L NSCLC (POPLAR). *J Clin Oncol.* 2015;33 (15\_suppl ):8010.
14. Herbst RS, Gordon MS, Fine GD, et al. A study of MPDL3280A, an engineered PD-L1 antibody in patients with locally advanced or metastatic tumors. *J Clin Oncol.* 2013;31 (15\_suppl

):3000.

15. Segal NH, Antonia SJ, Brahmer JR, et al. Preliminary data from a multi-arm expansion study of MEDI4736, an anti-PD-L1 antibody. *J Clin Oncol.* 2014;32 (15\_suppl ):3002.
16. Lutzky J, Antonia SJ, Blake-Haskins A, et al. A phase 1 study of MEDI4736, an anti-PD-L1 antibody, in patients with advanced solid tumors. *J Clin Oncol.* 2014;32 (15\_suppl ):3001.
17. Iguchi H, Nogami N, Kozuki T, et al. Phase I study to evaluate the safety and tolerability of MEDI4736, an anti-programmed cell death ligand-1 (PD-L1) antibody, in Japanese patients with advanced solid tumors. *J Clin Oncol.* 2015;33 (15\_suppl ):3039.
18. Segal NH, Ou S-HI, Balmanoukian AS, et al. Safety and efficacy of MEDI4736, an anti-PD-L1 antibody, in patients from a squamous cell carcinoma of the head and neck (SCCHN) expansion cohort. *J Clin Oncol.* 2015;33 (15\_suppl ):3011.
19. Rizvi NA, Brahmer JR, Ou S-HI, et al. Safety and clinical activity of MEDI4736, an anti-programmed cell death-ligand 1 (PD-L1) antibody, in patients with non-small cell lung cancer (NSCLC). *J Clin Oncol.* 2015;33 (15\_suppl ):8032.
20. Brahmer JR, Tykodi SS, Chow LQM, et al. Safety and activity of anti-PD-L1 antibody in patients with advanced cancer. *N Engl J Med.* 2012;366(26):2455-2465.

**Table S4:** Endocrine Adverse Events in studies with combinations of immune checkpoint inhibitors.

| Agents                 | First Author                                                            | Phase                                                                                       | Tumor type                                                                                | Pretreatment         | Schedule                                                                        | Endocrine AE, any grade (%)                                                                                              | Endocrine AE, grade 3-4 (%)                                                                                      |
|------------------------|-------------------------------------------------------------------------|---------------------------------------------------------------------------------------------|-------------------------------------------------------------------------------------------|----------------------|---------------------------------------------------------------------------------|--------------------------------------------------------------------------------------------------------------------------|------------------------------------------------------------------------------------------------------------------|
| Nivolumab + Ipilimumab | Wolchok et al. <sup>1</sup><br>n= 86<br><br>irAE occurring ≥3% reported | I                                                                                           | mMM                                                                                       | ≥ 3 doses ipilimumab | Nivolumab + Ipilimumab concurrent (n=53)                                        | Any Endocrine AE 16.7                                                                                                    | Any Endocrine AE 2.0                                                                                             |
|                        |                                                                         |                                                                                             |                                                                                           |                      | Scalating doses                                                                 | Hypothyroidism 4.0<br>Hypophysitis 4.0<br>Adrenal insufficiency 4.0<br>Thyroiditis 6.0                                   | Hypothyroidism 0<br>Hypophysitis 2.0<br>Adrenal insufficiency 0<br>Thyroiditis 0                                 |
|                        | Ipilimumab, Nivolumab sequential (n=33)                                 | Any Endocrine AE 9.0<br>Hypothyroidism 3.0<br>Hypophysitis 3.0<br>Adrenal insufficiency 3.0 | Any Endocrine AE 6.0<br>Hypothyroidism 0<br>Hypophysitis 3.0<br>Adrenal insufficiency 3.0 |                      |                                                                                 |                                                                                                                          |                                                                                                                  |
|                        | Postow et al. <sup>2</sup><br>N= 142                                    | II                                                                                          | mMM                                                                                       | Naïve                | Nivolumab + Ipilimumab<br><br>N 1mg/kg Q3W + I 3mg/kg Q3W x4, then N 3mg/kg Q2W | Any endocrine AE 38.4*<br><br>Hypothyroidism 16<br>Hyperthyroidism 4.3<br>Hypophysitis 11.7<br>Adrenal insufficiency 6.4 | Any endocrine AE 3.2<br><br>Hypothyroidism 0<br>Hyperthyroidism 0<br>Hypophysitis 2.1<br>Adrenal insufficiency 0 |

|                                                                                |     |              |            |                                                         |                                                                     |                                                                                                     |                                                                                                     |   |
|--------------------------------------------------------------------------------|-----|--------------|------------|---------------------------------------------------------|---------------------------------------------------------------------|-----------------------------------------------------------------------------------------------------|-----------------------------------------------------------------------------------------------------|---|
|                                                                                |     |              |            |                                                         |                                                                     |                                                                                                     | 1.1<br>Decreased TSH                                                                                | 0 |
|                                                                                |     |              |            |                                                         | Ipilimumab<br>3 mg/kg Q3W x4                                        | Hypothyroidism<br>1.5 Hypopituitarism<br>2.3<br>Hypophysitis<br>1.5<br>Adrenal insufficiency<br>1.5 | Hypothyroidism<br>1.5 Hypopituitarism<br>2.3<br>Hypophysitis<br>1.5<br>Adrenal insufficiency<br>1.5 |   |
| Larkin et al. <sup>3</sup><br><br>N= 945<br><br>irAE occurring<br>≥5% reported | III | mMM          | Naïve      | Nivolumab +<br>Ipilimumab                               | Any Endocrine AE<br>32.6*                                           | Any Endocrine AE<br>2.9                                                                             |                                                                                                     |   |
|                                                                                |     |              |            | N 1mg/kg Q3W + I<br>3mg/kg Q3W x4, then<br>I 3mg/kg Q2W | Hypothyroidism<br>15 Hyperthyroidism<br>9.9<br>Hypophysitis<br>7.7  | Hypothyroidism<br>0.3 Hyperthyroidism<br>1.0<br>Hypophysitis<br>1.6                                 |                                                                                                     |   |
|                                                                                |     |              |            | Ipilimumab<br>3 mg/kg Q3W x4                            | Hypothyroidism<br>4.2 Hyperthyroidism<br>1<br>Hypophysitis<br>3.9   | Hypothyroidism<br>Hyperthyroidism<br>Hypophysitis<br>1.9                                            | 0<br>0                                                                                              |   |
|                                                                                |     |              |            | Nivolumab<br>3mg/kg Q2W                                 | Hypothyroidism<br>8.6 Hyperthyroidism<br>4.2<br>Hypophysitis<br>0.6 | Hypothyroidism<br>Hyperthyroidism<br>Hypophysitis<br>0.3                                            | 0<br>0                                                                                              |   |
| Sampson et al. <sup>4</sup>                                                    | I   | Glioblastoma | Pretreated | Nivolumab +<br>Ipilimumab                               | Any endocrine AE<br>50                                              | Any endocrine AE                                                                                    | 20                                                                                                  |   |

|                                          |      |      |            |                                                                                                                                |                                                                                                        |                                                                                    |                                         |    |
|------------------------------------------|------|------|------------|--------------------------------------------------------------------------------------------------------------------------------|--------------------------------------------------------------------------------------------------------|------------------------------------------------------------------------------------|-----------------------------------------|----|
| N=20                                     |      |      |            |                                                                                                                                | N 1mg/kg Q3W + I<br>3mg/kg Q3W x4, then<br>I 3mg/kg Q2W (n=10)                                         | Hypothyroidism<br>20 Hyperthyroidism<br>30                                         | Hypothyroidism<br>Hyperthyroidism<br>10 | 10 |
|                                          |      |      |            |                                                                                                                                | Ipilimumab<br><br>3 mg/kg Q3W x4<br>(n=10)                                                             | Any endocrine AE<br><br>Hypothyroidism<br>10 Hyperthyroidism<br>10                 | Any endocrine AE                        | 0  |
| Hammers et al. <sup>5</sup><br><br>N=100 | I    | mRCC | Pretreated | Cohort 1:<br>N 3mg/kg +<br>I 1 mg/kg Q3W<br>Cohort 2:<br>N 1mg/kg +<br>I 3mg/kg Q3W<br>Cohort 3:<br>N 1mg/kg +<br>I 1mg/kg Q3W | Any endocrine AE<br>36<br><br>Hypothyroidism<br>27 Hyperthyroidism<br>14<br>Adrenal insufficiency<br>8 | Any endocrine AE<br><br>Hypothyroidism<br>Hyperthyroidism<br>Adrenal insufficiency | 1<br><br>0<br>1<br>0                    |    |
| Antonia et al. <sup>6</sup><br><br>N=90  | I/II | SCLC | Pretreated | Cohort 1:<br>N 3mg/kg +<br>I 1 mg/kg Q3W<br>Cohort 2:<br>N 1mg/kg +<br>I 3mg/kg Q3W<br>Cohort 3:<br>N 1mg/kg +<br>I 1mg/kg Q3W | Any endocrine AE<br>28<br><br>Hypothyroidism<br>15 Hyperthyroidism<br>13                               | Any endocrine AE                                                                   | 0                                       |    |
|                                          |      |      |            | Nivolumab<br><br>3mg/kg Q3W                                                                                                    | Any endocrine AE<br>5                                                                                  | Any endocrine AE                                                                   | 0                                       |    |

|                                         |    |       |       |                                                                                     |                                                                                                                                               |                                                                                                                                     |  |
|-----------------------------------------|----|-------|-------|-------------------------------------------------------------------------------------|-----------------------------------------------------------------------------------------------------------------------------------------------|-------------------------------------------------------------------------------------------------------------------------------------|--|
|                                         |    |       |       |                                                                                     |                                                                                                                                               | Hypothyroidism<br>2.5 Hyperthyroidism<br>2.5                                                                                        |  |
| Hodi et al. <sup>7</sup><br><br>N=142   | II | mMM   | Naïve | N 1mg/kg Q3W + I<br>3mg/kg Q3W x4, then<br>I 3mg/kg Q2W (N=95)                      | Any endocrine AE<br>36.2<br><br>Hypothyroidism<br>17 Thyroid disorder<br>24.5<br>Hypophysitis<br>12.8                                         | Any endocrine AE<br>5.3<br><br>Hypothyroidism<br>0<br>Thyroid disorder<br>1.0<br>Hypophysitis<br>2.1                                |  |
|                                         |    |       |       | Ipilimumab<br><br>3 mg/kg Q3W (N=47)                                                | Any endocrine AE<br>37<br><br>Hypothyroidism<br>32.6 Thyroid disorder<br>32.6<br>Hypophysitis<br>15.2                                         | Any endocrine AE<br>8.7<br><br>Hypothyroidism<br>0<br>Thyroid disorder<br>0<br>Hypophysitis<br>8.7                                  |  |
| Antonia et al. ASCO<br>2014<br><br>N=49 |    | NSCLC | Naïve | Cohort 1:<br>N 1mg/kg +<br>I 3 mg/kg Q3W<br>Cohort 2:<br>N 3mg/kg +<br>I 1mg/kg Q3W | Any endocrine AE<br>22.4<br>N1 + I3<br>N1 + I3<br>NR<br>N3 + I1<br>NR<br><br>Adrenal insufficiency<br>6.0<br>N1 + I3<br>8.3<br>N3 + I1<br>4.0 | Any endocrine AE<br>6.1<br>N1 + I3<br>8.3<br>N3 + I1<br>4.0<br><br>Adrenal insufficiency<br>4.0<br>N1 + I3<br>4.2<br>N3 + I1<br>4.0 |  |



|                            |                                       |    |                         |            |                                                                                                                    |                                                                                                                                                  |                                                                                                                                         |
|----------------------------|---------------------------------------|----|-------------------------|------------|--------------------------------------------------------------------------------------------------------------------|--------------------------------------------------------------------------------------------------------------------------------------------------|-----------------------------------------------------------------------------------------------------------------------------------------|
| Pembrolizumab + Ipilimumab | Atkins et al. <sup>8</sup><br>N= 22   | I  | mMM (54%)<br>mRCC (45%) | Pretreated | Pembrolizumab 2 mg/kg + Ipilimumab 1 mg/kg Q3W fx4, then pembrolizumab 2 mg/kg Q3W                                 | Any endocrine AE 27.3<br>Hypothyroidism 13.6<br>Hyperthyroidism 4.5<br>Hypophysitis 9.1                                                          | Any endocrine AE 4.5<br>Hypothyroidism 0<br>Hyperthyroidism 4.5<br>Hypophysitis 0                                                       |
|                            | Patnaik et al. <sup>9</sup><br>N= 18  | I  | NSCLC                   | Pretreated | Cohort 1: P 10 mg/kg Q3W + I 3 mg/kg<br>Cohort 2: P 10 mg/kg Q3W + I 1mg/kg<br>Cohort 3: P 2 mg/kg Q3W + I 1 mg/kg | Any endocrine AE 27.8<br>Hypothyroidism 6.0<br>Hyperthyroidism 6.0<br>Thyroiditis 6.0<br>Autoimmune thyroiditis 6.0<br>Adrenal insufficiency 6.0 | Any endocrine AE 6.0<br>Hypothyroidism 0<br>Hyperthyroidism 0<br>Thyroiditis 0<br>Autoimmune thyroiditis 0<br>Adrenal insufficiency 6.0 |
| Durvalumab + Tremelimumab  | Antonia et al. <sup>10</sup><br>N=102 | Ib | NSCLC                   | Pretreated | Durvalumab 3-20mg/kg Q4W or 10mg/kg Q2W + Tremelimumab 3-10mg/kg Q4W                                               | Hypothyroidism 5.9                                                                                                                               | Hypothyroidism 1.0                                                                                                                      |

**Bibliography of Supplemental Table 4**

1. Hamid O, Robert C, Daud A, et al. Safety and tumor responses with lambrolizumab (anti-PD-1) in melanoma. N Engl J Med. 2013;369(2):134-144.
2. Postow MA, Chesney J, Pavlick AC, et al. Nivolumab and Ipilimumab versus Ipilimumab in Untreated Melanoma. N Engl J Med. 2015;372(21):2006-2017.
3. Larkin J, Chiarion-Sileni V, Gonzalez R, et al. Combined Nivolumab and Ipilimumab or Monotherapy in Untreated Melanoma. N Engl J Med. May 2015.
4. Sampson JH, Vlahovic G, Sahebjam S, et al. Preliminary safety and activity of nivolumab and its combination with ipilimumab in recurrent glioblastoma (GBM): CHECKMATE-143. J Clin Oncol 2015;33 (15 suppl):3010a.
5. Hammers HJ, Plimack ER, Sternberg C, et al. CheckMate 214: A phase III, randomized, open-label study of nivolumab combined with ipilimumab versus sunitinib monotherapy in patients with previously untreated metastatic renal cell carcinoma. J Clin Oncol. 2015;33 (15\_suppl ):TPS4578.
6. Antonia SJ, Bendell JC, Taylor MH, et al. Phase I/II study of nivolumab with or without ipilimumab for treatment of recurrent small cell lung cancer (SCLC): CA209-

032. J Clin Oncol. 2015;33 (15\_suppl ):7503.

7. Hodi FS, Postow MA, Chesney JA, et al. Clinical response, progression-free survival (PFS), and safety in patients (pts) with advanced melanoma (MEL) receiving nivolumab (NIVO) combined with ipilimumab (IPI) vs IPI monotherapy in CheckMate 069 study. J Clin Oncol. 2015;33 (15\_suppl ):9004.
8. Atkins MB, Choueiri TK, Hodi FS, et al. Pembrolizumab (MK-3475) plus low-dose ipilimumab (IPI) in patients (pts) with advanced melanoma (MEL) or renal cell carcinoma (RCC): Data from the KEYNOTE-029 phase 1 study. J Clin Oncol. 2015;33 (15\_suppl ):3009.
9. Patnaik A, Socinski MA, Gubens MA, et al. Phase 1 study of pembrolizumab (pembro; MK-3475) plus ipilimumab (IPI) as second-line therapy for advanced non-small cell lung cancer (NSCLC): KEYNOTE-021 cohort D. J Clin Oncol. 2015;33 (15\_suppl ):8011.
10. Antonia SJ, Goldberg SB, Balmanoukian AS, et al. Phase Ib study of MEDI4736, a programmed cell death ligand-1 (PD-L1) antibody, in combination with tremelimumab, a cytotoxic T-lymphocyte-associated protein-4 (CTLA-4) antibody, in patients (pts) with advanced NSCLC. J Clin Oncol. 2015;33(15\_suppl):3014.
